# Supplementary material
Source: PubMed Central journal article supplement (PMC7902306)

Sup Figure 1

**A**

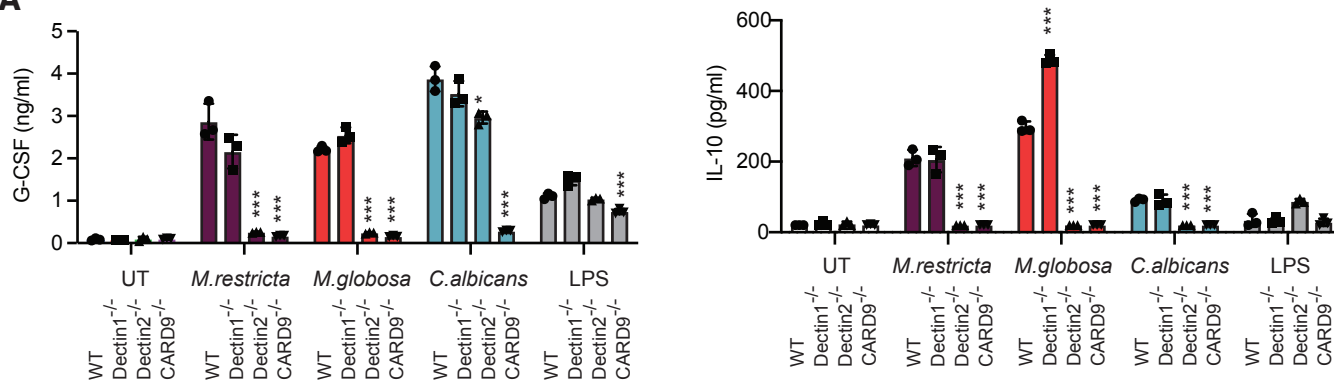

**B**

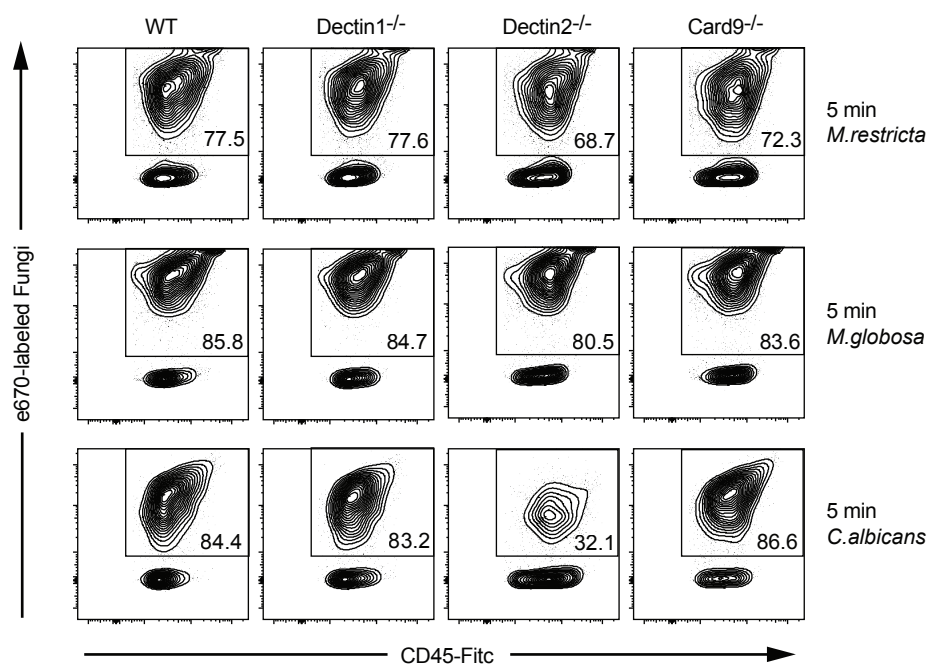

**C**

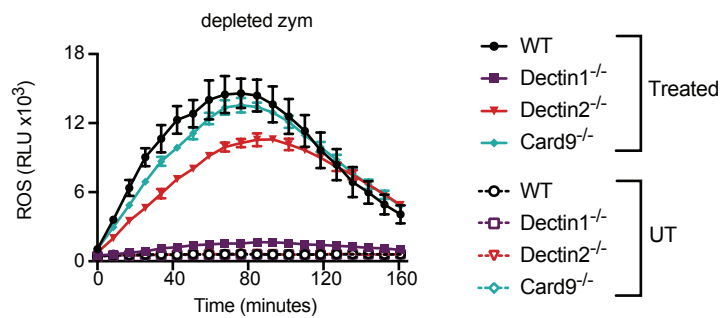

Supplement: NIHMS1631047-supplement-Sup_Fig_S1.pdf [file NIHMS1631047-supplement-Sup_Fig_S1.pdf]
